# Supplementary material for: The Crystal Structure of Bacillus cereus HblL1
Source: MDPI journal article supplement (doi:10.3390/toxins13040253), 2021-03-31
Supplement: s1 [file s1]

## Supplementary Materials: The Crystal Structure of *Bacillus cereus* HblL<sub>1</sub>

Harley L. Worthy, Lainey Williamson, Husam Sabah Auhim, Stephen H. Leppla, Inka Sastalla, D. Dafydd Jones, Pierre J. Rizkallah and Colin Berry

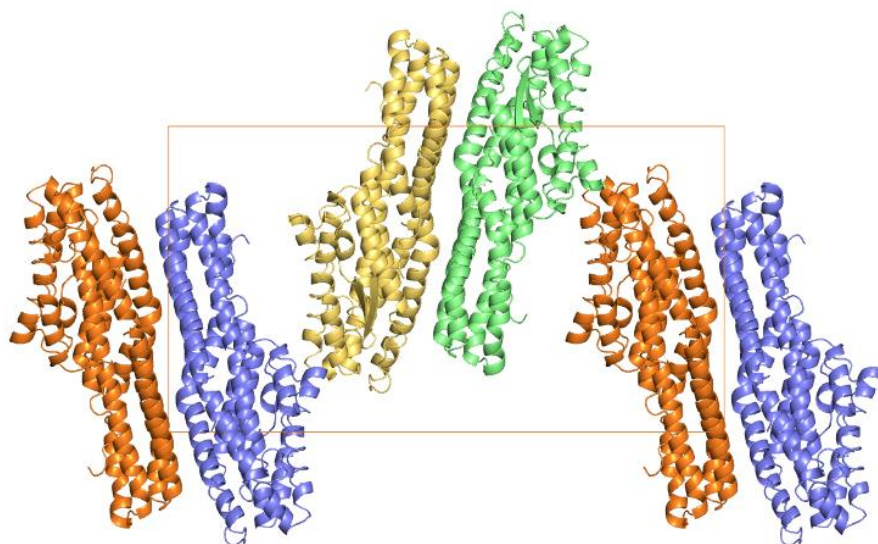

**Figure S1.** Crystal packing of HblL<sub>1</sub>.

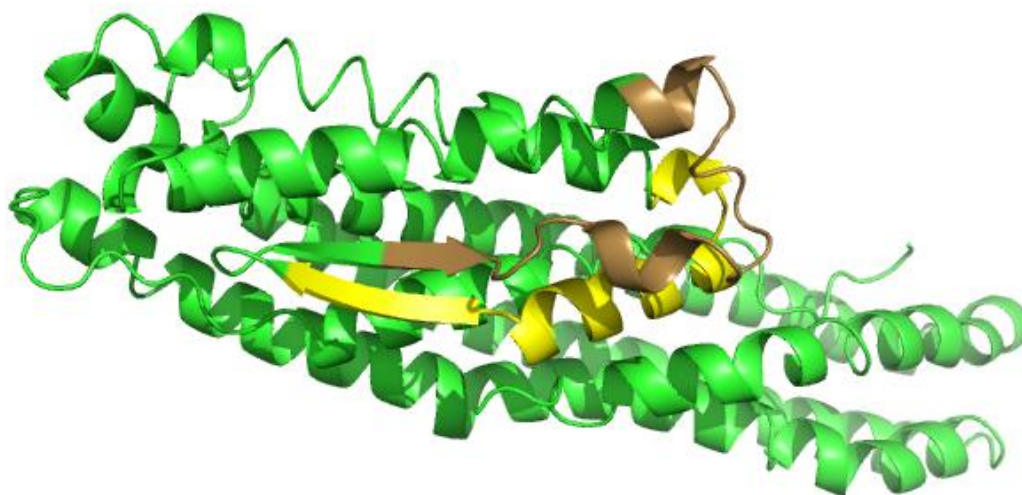

**Figure S2.** Predicted transmembrane regions in HblL<sub>1</sub>. Tm region 1, residues 239-261 is shown in yellow; Tm region 2, residues 268-290 is shown in light brown.

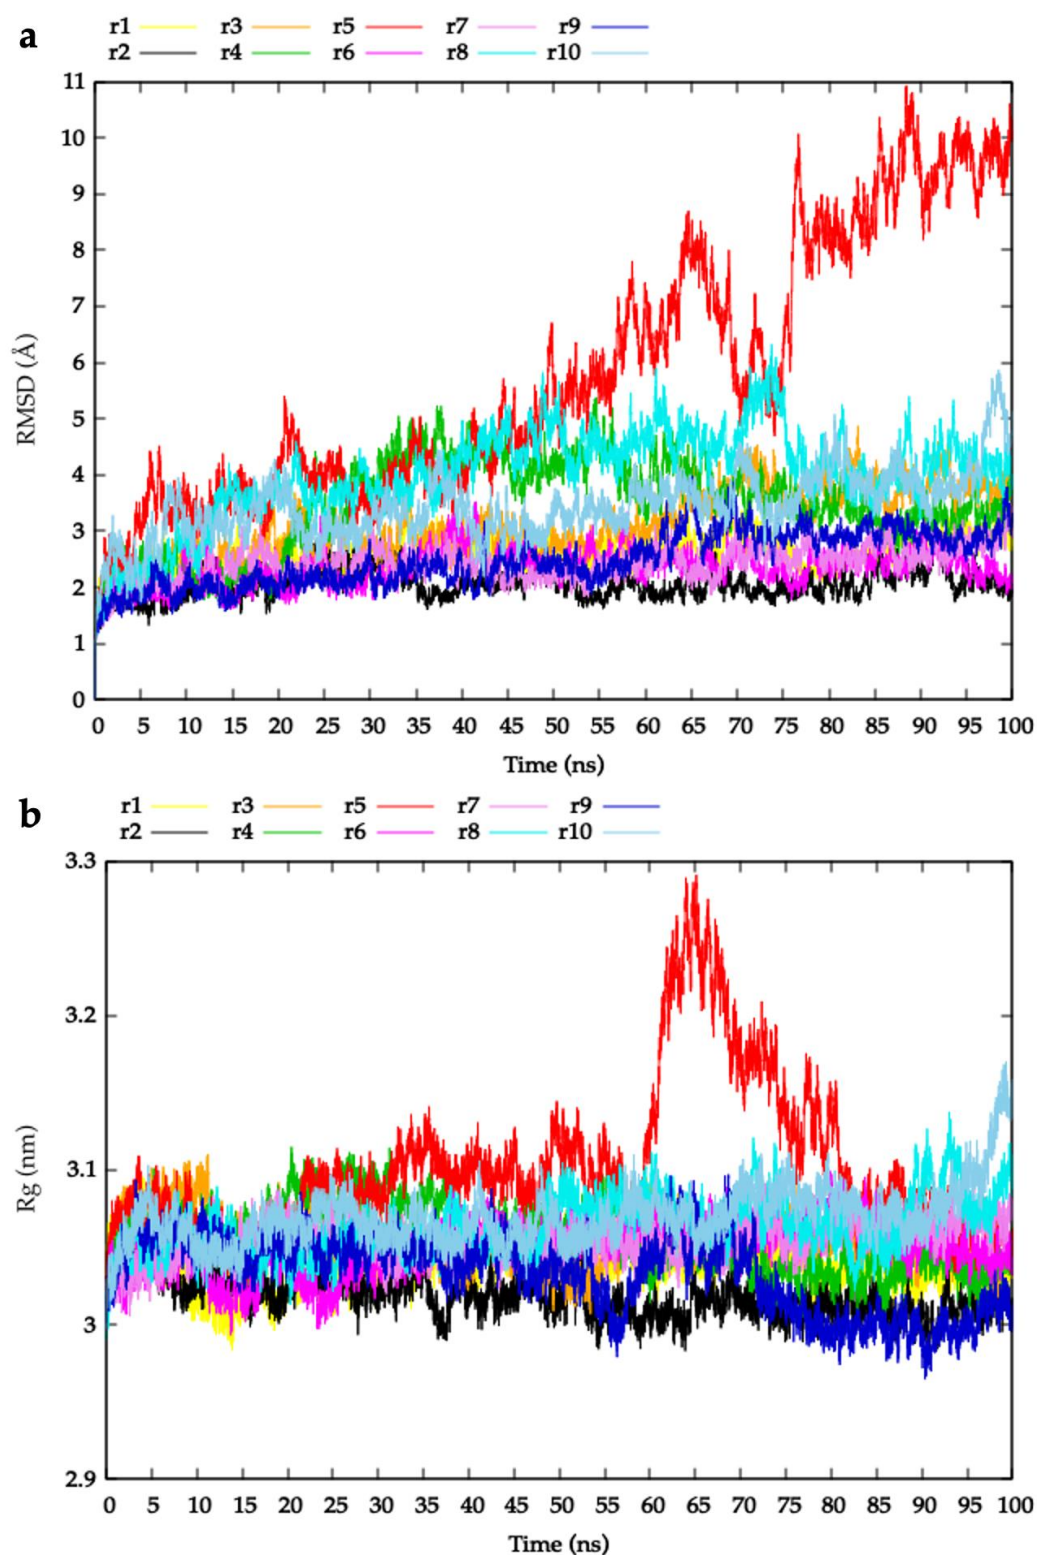

**Figure S3.** Molecular dynamic analysis of HblL1-HblB complexes. (a) Root-mean-square deviation of the position of backbone atoms in HblL1-HblB modelled complexes r1 - r10 throughout 100 ns MD simulations; (b) Radius of gyration of HblL1-HblB modelled complexes r1 - r10.

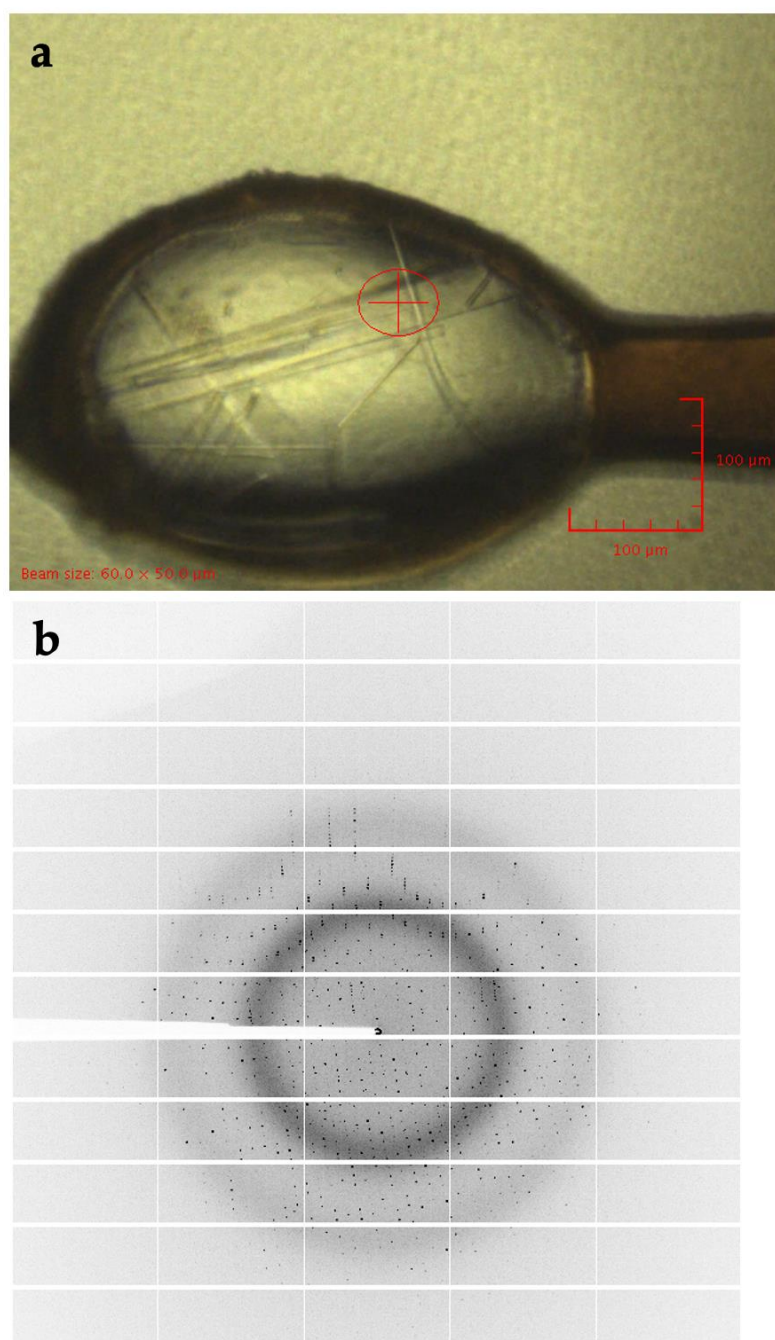

**Figure S4.** HbLL<sub>1</sub> crystal and diffraction image. (a) single crystal from which data were collected; (b) single frame from diffraction pattern derived from this crystal.
